# Supplementary material
Source: publisher figshare collection journal article supplement (https://karger.figshare.com/ndownloader/files/14413427)
Supplement: Supplementary file 1 [file 14413427]

**Supplementary Table S2**. Multivariable odds ratios and 95% confidence intervals for the associations between baseline characteristics and phosphorus testing

|  | OR (95% CI) | | |
| --- | --- | --- | --- |
|  | CKD Stage 3 | CKD Stage 4 | CKD Stage 5 |
|  | *n* = 640,946 | *n* = 136,278 | *n* = 22,076 |
| Age category |  |  |  |
| 18-64 | 1.28 (1.25-1.31) | 1.15 (1.10-1.20) | 1.03 (0.94-1.13) |
| 65-74 | 1.21 (1.19-1.23) | 1.23 (1.19-1.27) | 1.16 (1.08-1.25) |
| 75-84 | 1 (Ref) | 1 (Ref) | 1 (Ref) |
| ≥ 85 | 0.61 (0.61-0.62) | 0.60 (0.58-0.62) | 0.58 (0.53-0.63) |
| Female | 0.97 (0.96-0.99) | 0.90 (0.88-0.93) | 0.94 (0.88-1.00) |
| Race/ethnicity |  |  |  |
| White | 1 (Ref) | 1 (Ref) | 1 (Ref) |
| Black | 1.07 (1.05-1.09) | 0.98 (0.94-1.01) | 0.93 (0.87-1.01) |
| Asian | 0.88 (0.85-0.92) | 1.01 (0.93-1.10) | 1.18 (0.99-1.42) |
| Hispanic | 0.97 (0.93-1.01) | 0.95 (0.87-1.03) | 0.97 (0.82-1.14) |
| Other | 0.86 (0.82-0.89) | 0.80 (0.74-0.86) | 0.84 (0.71-0.99) |
| Census region |  |  |  |
| Northeast | 0.98 (0.97-1.00) | 0.98 (0.95-1.02) | 0.97 (0.90-1.06) |
| Midwest | 0.99 (0.98-1.01) | 1.04 (1.01-1.07) | 1.11 (1.03-1.20) |
| South | 1 (Ref) | 1 (Ref) | 1 (Ref) |
| West | 1.10 (1.09-1.12) | 1.14 (1.10-1.18) | 1.04 (0.95-1.14) |
| Missing | 0.57 (0.51-0.64) | 0.51 (0.41-0.64) | 0.62 (0.41-0.93) |
| Comorbid conditions |  |  |  |
| Atherosclerotic heart disease | 1.04 (1.03-1.06) | 0.95 (0.93-0.98) | 0.89 (0.83-0.95) |
| Congestive heart failure | 0.84 (0.83-0.85) | 0.70 (0.68-0.72) | 0.69 (0.65-0.74) |
| Dysrhythmia | 0.87 (0.86-0.88) | 0.79 (0.77-0.81) | 0.76 (0.70-0.81) |
| Cerebrovascular disease | 0.84 (0.83-0.85) | 0.78 (0.75-0.80) | 0.71 (0.66-0.77) |
| Peripheral vascular disease | 0.91 (0.90-0.92) | 0.85 (0.82-0.87) | 0.83 (0.78-0.89) |
| Other cardiac | 0.99 (0.97-1.00) | 0.90 (0.87-0.92) | 0.81 (0.76-0.88) |
| COPD | 0.86 (0.85-0.87) | 0.75 (0.73-0.77) | 0.75 (0.70-0.81) |
| Gastrointestinal bleeding | 0.79 (0.76-0.83) | 0.80 (0.74-0.85) | 0.77 (0.65-0.92) |
| Liver disease | 0.85 (0.82-0.88) | 0.67 (0.63-0.72) | 0.59 (0.49-0.70) |
| Cancer | 1.00 (0.99-1.02) | 0.82 (0.80-0.85) | 0.85 (0.78-0.93) |
| Diabetes | 1.10 (1.09-1.11) | 1.02 (0.99-1.05) | 0.97 (0.91-1.03) |
| Hypertension | 1.20 (1.18-1.23) | 1.25 (1.19-1.31) | 1.58 (1.38-1.80) |
| Prior nephrology care | 4.78 (4.73-4.84) | 3.98 (3.88-4.07) | 3.53 (3.30-3.78) |

CI, confidence interval; CKD, chronic kidney disease; COPD, chronic obstructive pulmonary disease; OR, odds ratio.
